# Supplementary material for: Enhanced carrier separation in ferroelectric In2Se3/MoS2 van der Waals heterostructure
Source: Royal Society of Chemistry journal article supplement (doi:10.1039/d0tc02366c), 2020-01-01
Supplement: d0tc02366c1.pdf [file d0tc02366c1.pdf]

## Electronic Supplementary Information

### Enhanced carrier separation in ferroelectric In<sub>2</sub>Se<sub>3</sub>/MoS<sub>2</sub> van der Waals heterostructure

Bin Zhou<sup>a</sup>, Kai Jiang<sup>a</sup>, Liyan Shang<sup>a</sup>, Jinzhong Zhang<sup>a</sup>, Yawei Li<sup>a</sup>, Liangqing Zhu<sup>a</sup>,  
Shi-Jing Gong<sup>\*b</sup>, Zhigao Hu<sup>\*a,c,d</sup> and Junhao Chu<sup>a,c,d</sup>

<sup>a</sup> Technical Center for Multifunctional Magneto-Optical Spectroscopy (Shanghai),  
Engineering Research Center of Nanophotonics & Advanced Instrument (Ministry of  
Education), Department of Materials, School of Physics and Electronic Science, East China  
Normal University, Shanghai 200241, China

<sup>b</sup> Key Laboratory of Polar Materials and Devices (MOE), East China Normal University,  
Shanghai 200241, China

<sup>c</sup> Collaborative Innovation Center of Extreme Optics, Shanxi University, Taiyuan, Shanxi  
030006, China

<sup>d</sup> Shanghai Institute of Intelligent Electronics & Systems, Fudan University, Shanghai 200433,  
China

\*Corresponding authors: [sjgong@ee.ecnu.edu.cn](mailto:sjgong@ee.ecnu.edu.cn); [zghu@ee.ecnu.edu.cn](mailto:zghu@ee.ecnu.edu.cn)

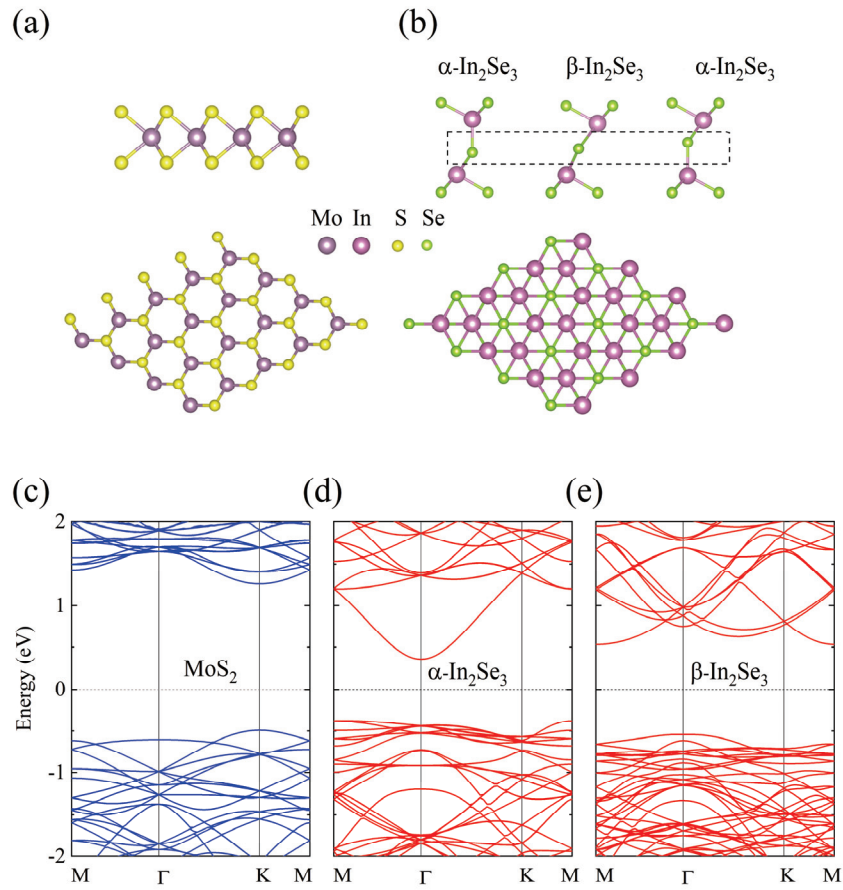

Fig. S1 Top and side views of (a) MoS<sub>2</sub> and (b) α-In<sub>2</sub>Se<sub>3</sub>(β-In<sub>2</sub>Se<sub>3</sub>) monolayers. The band structures of monolayer (c) MoS<sub>2</sub>, (d) α-In<sub>2</sub>Se<sub>3</sub> and (e) β-In<sub>2</sub>Se<sub>3</sub>.

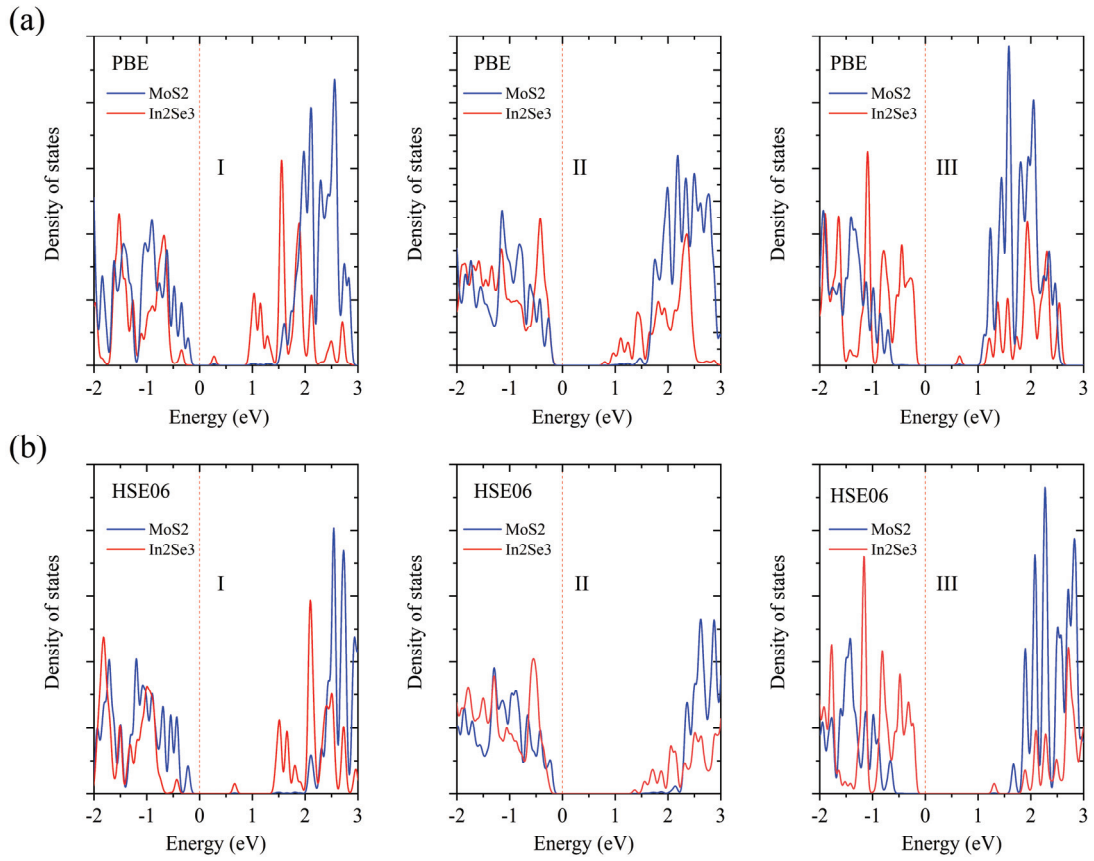

Fig. S2 Calculated PDOS of the In<sub>2</sub>Se<sub>3</sub>/MoS<sub>2</sub> (I, II, III) heterostructures based on PBE (a) and HSE06 (b).

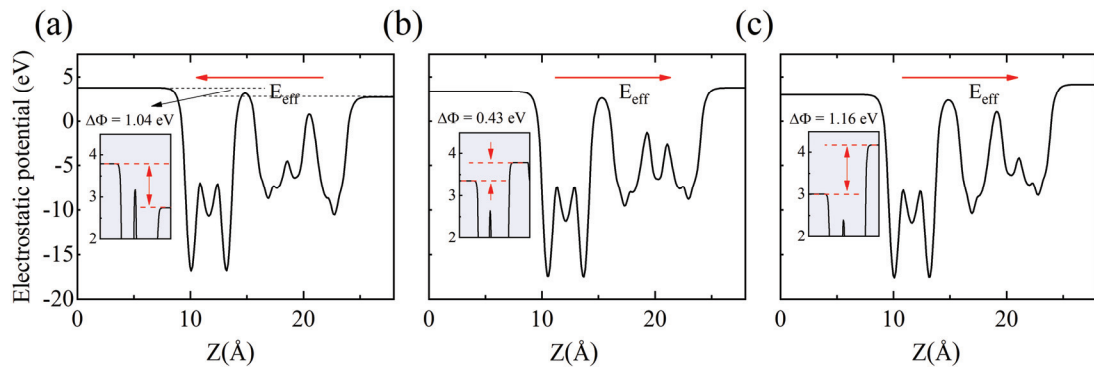

Fig. S3 Surface potential differences for (a) In<sub>2</sub>Se<sub>3</sub>/MoS<sub>2</sub> (I), (b) In<sub>2</sub>Se<sub>3</sub>/MoS<sub>2</sub> (II) and (c) In<sub>2</sub>Se<sub>3</sub>/MoS<sub>2</sub> (III). The  $E_{\text{net}}$  represent the effective electric field across the heterostructure interface.

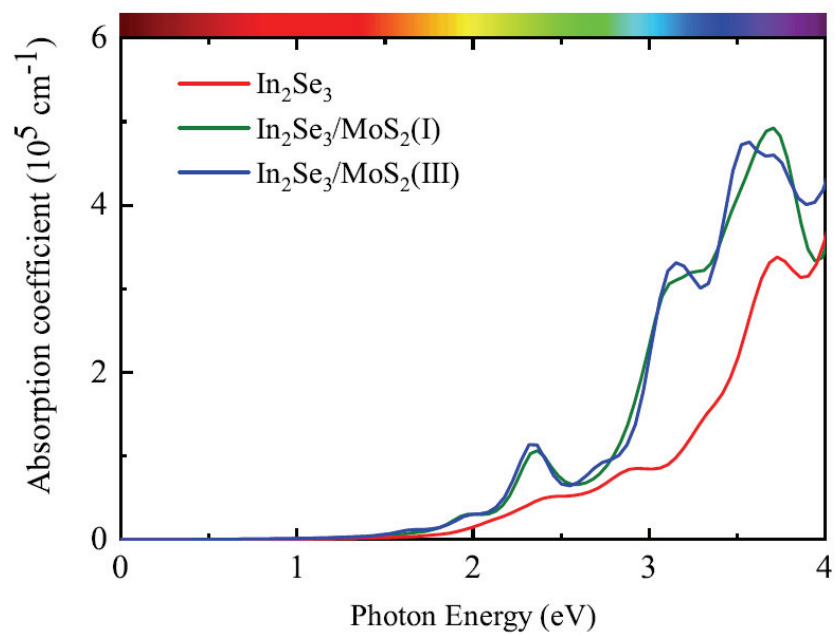

Fig. S4 The optical absorption of the  $\text{In}_2\text{Se}_3/\text{MoS}_2$  (I, III) heterostructures and the isolated  $\text{In}_2\text{Se}_3$  monolayer, based on HSE06 calculations.
